# Supplementary material for: A system-level, molecular evolutionary analysis of mammalian phototransduction
Source: PubMed Central journal article supplement (PMC3616935; doi:10.1186/1471-2148-13-52), 2013-02-23
Supplement: 1471-2148-13-52-S1.pdf [file 1471-2148-13-52-S1.pdf]

# **A system-level, molecular evolutionary analysis of mammalian phototransduction (supplementary material)**

Brandon M Invergo<sup>1</sup> , Ludovica Montanucci\*<sup>1</sup> , Hafid Laayouni<sup>1</sup> and Jaume Bertranpetit<sup>1</sup>

<sup>1</sup>IBE-Institute of Evolutionary Biology (UPF-CSIC), CEXS-UPF-PRBB, Barcelona, Catalonia, Spain

Email: Brandon Invergo - brandon.invergo@upf.edu; Ludovica Montanucci\* - ludovica.montanucci@upf.edu; Hafid Laayouni - hafid.laayouni@upf.edu; Jaume Bertranpetit - jaume.bertranpetit@upf.edu;

\*Corresponding author

## **Table S1 - Classifications of the genes**

Genes were assigned classifications according to their photoreceptor cell-type specificity, the process in which the encoded protein is primarily active, and the general function of the encoded protein. (Note: here "enzyme" specifically refers to enzymes involved in retinoid recycling.)

| gene    | cell type | process           | function                 |
|---------|-----------|-------------------|--------------------------|
| ABCA4   | shared    | retinoid cycle    | enzyme                   |
| AIPL1   | shared    | phototransduction | other                    |
| ARR3    | cone      | phototransduction | signal regulator         |
| ASCL1   | rod       | development       | transcription regulation |
| CNGA1   | rod       | phototransduction | ion channel              |
| CNGA3   | cone      | phototransduction | ion channel              |
| CNGB1   | rod       | phototransduction | ion channel              |
| CNGB3   | cone      | phototransduction | ion channel              |
| CRX     | shared    | development       | transcription regulation |
| GNAT1   | rod       | phototransduction | G protein                |
| GNAT2   | cone      | phototransduction | G protein                |
| GNB1    | rod       | phototransduction | G protein                |
| GNB3    | cone      | phototransduction | G protein                |
| GNB5    | shared    | phototransduction | G protein                |
| GNGT1   | rod       | phototransduction | G protein                |
| GNGT2   | cone      | phototransduction | G protein                |
| GPSM2   | shared    | phototransduction | other                    |
| GRK1    | shared    | phototransduction | signal regulator         |
| GUCA1A  | shared    | phototransduction | signal regulator         |
| GUCA1B  | shared    | phototransduction | signal regulator         |
| GUCY2D  | shared    | phototransduction | other                    |
| GUCY2F  | shared    | phototransduction | other                    |
| LRAT    | shared    | retinoid cycle    | enzyme                   |
| NEUROD1 | shared    | development       | transcription regulation |
| NR2E3   | rod       | development       | transcription regulation |
| NR2F1   | cone      | development       | transcription regulation |
| NRL     | rod       | development       | transcription regulation |
| OPN1SW  | cone      | phototransduction | other                    |
| OTX2    | shared    | development       | transcription regulation |
| PDC     | shared    | phototransduction | signal regulator         |
| PDE6A   | rod       | phototransduction | phosphodiesterase        |
| PDE6B   | rod       | phototransduction | phosphodiesterase        |
| PDE6C   | cone      | phototransduction | phosphodiesterase        |
| PDE6G   | rod       | phototransduction | phosphodiesterase        |
| PDE6H   | cone      | phototransduction | phosphodiesterase        |
| PIAS3   | rod       | development       | transcription regulation |
| PRPH2   | shared    | development       | other                    |
| RBP1    | shared    | retinoid cycle    | chaperon                 |
| RBP3    | shared    | retinoid cycle    | chaperon                 |

| gene    | cell type | process           | function                 |
|---------|-----------|-------------------|--------------------------|
| RCVRN   | shared    | phototransduction | signal regulator         |
| RDH12   | shared    | retinoid cycle    | enzyme                   |
| RDH5    | shared    | retinoid cycle    | enzyme                   |
| RDH8    | shared    | retinoid cycle    | enzyme                   |
| RGR     | shared    | retinoid cycle    | enzyme                   |
| RGS9    | shared    | phototransduction | signal regulator         |
| RGS9BP  | shared    | phototransduction | other                    |
| RHO     | rod       | phototransduction | other                    |
| RLBP1   | shared    | retinoid cycle    | chaperon                 |
| ROM1    | shared    | development       | other                    |
| RORA    | cone      | development       | transcription regulation |
| RORB    | shared    | development       | transcription regulation |
| RPE65   | shared    | retinoid cycle    | enzyme                   |
| RXRG    | cone      | development       | transcription regulation |
| SAG     | rod       | phototransduction | signal regulator         |
| SLC24A1 | rod       | phototransduction | ion channel              |
| SLC24A2 | cone      | phototransduction | ion channel              |
| THR3    | cone      | development       | transcription regulation |

## Table S2 - Protein interactions in the phototransduction signaling pathway

The status of each interaction is defined as "confirmed", or generally considered to be true by multiple sources such as reviews; "suggested", or proposed by a primary research source but not replicated; or "inferred", or inferred from a primary research source, such as indirect interactions across a molecular complex where no direct interaction is described or interactions of a paralogous protein to that described in the research.

| Gene 1  | Gene 2 | Status    | Primary Source |
|---------|--------|-----------|----------------|
| SAG     | SAG    | confirmed | [1]            |
| GRK1    | RCVRN  | confirmed | [2]            |
| SLC24A2 | CNGA3  | confirmed | [3]            |
| SLC24A2 | CNGB3  | confirmed | [3]            |
| SLC24A1 | CNGA1  | confirmed | [3]            |
| SLC24A1 | CNGB1  | confirmed | [3]            |
| CNGB1   | PRPH2  | confirmed | [4]            |
| CNGB3   | CNGA3  | confirmed | [5]            |
| CNGA3   | CNGA3  | confirmed | [5]            |
| CNGB3   | CNGB3  | confirmed | [5]            |
| CNGA1   | CNGB1  | confirmed | [6]            |
| CNGA1   | CNGA1  | confirmed | [7]            |
| CNGB3   | PDE6C  | inferred  | [8]            |
| CNGB3   | PDE6H  | inferred  | [8]            |
| CNGB1   | PDE6A  | suggested | [8]            |
| CNGB1   | PDE6B  | suggested | [8]            |
| CNGB1   | PDE6G  | suggested | [8]            |
| GPSM2   | GNAT2  | suggested | [9]            |
| GPSM2   | GNAT1  | suggested | [9]            |
| PDE6C   | GNAT2  | inferred  | [10]           |
| PDE6H   | GNAT2  | inferred  | [11]           |
| GNAT1   | PDE6A  | inferred  | [10]           |
| GNAT1   | PDE6G  | confirmed | [11]           |
| GNAT1   | PDE6B  | inferred  | [10]           |
| ARR3    | OPN1SW | confirmed | [12]           |
| GRK1    | OPN1SW | confirmed | [12]           |
| OPN1SW  | GNAT2  | inferred  | [13, 14]       |
| OPN1SW  | GNB3   | inferred  | [15]           |
| OPN1SW  | GNGT2  | inferred  | [16]           |
| SAG     | RHO    | confirmed | [17]           |
| GRK1    | RHO    | confirmed | [18]           |
| RHO     | GNAT1  | confirmed | [19]           |
| RHO     | GNB1   | confirmed | [19]           |
| RHO     | GNGT1  | confirmed | [19]           |
| PRPH2   | PRPH2  | confirmed | [20]           |
| PRPH2   | ROM1   | confirmed | [20]           |
| PDC     | GNB3   | confirmed | [21]           |
| PDC     | GNGT2  | confirmed | [21]           |
| PDC     | GNB1   | confirmed | [22]           |

| Gene 1 | Gene 2 | Status    | Source       |
|--------|--------|-----------|--------------|
| PDC    | GNGT1  | confirmed | [22]         |
| PDE6C  | PDE6H  | confirmed | [23, 24]     |
| PDE6C  | PDE6C  | inferred  | [24]         |
| PDE6H  | PDE6H  | inferred  | [25]         |
| PDE6A  | PDE6G  | confirmed | [26]         |
| PDE6A  | PDE6B  | confirmed | [26]         |
| PDE6B  | PDE6G  | confirmed | [26]         |
| PDE6G  | PDE6G  | inferred  | [25]         |
| GUCY2D | GUCY2F | inferred  | [27]         |
| GUCY2D | GUCY2D | confirmed | [27]         |
| GUCY2F | GUCY2F | inferred  | [27]         |
| GNAT2  | GUCY2D | confirmed | [28]         |
| GNAT2  | GUCY2F | confirmed | [28]         |
| GNAT1  | GUCY2D | confirmed | [28]         |
| GNAT1  | GUCY2F | confirmed | [28]         |
| GUCA1A | GUCY2F | confirmed | [29]         |
| GUCA1B | GUCY2F | confirmed | [29]         |
| GUCA1A | GUCY2D | confirmed | [29]         |
| GUCA1B | GUCY2D | confirmed | [29]         |
| RGS9   | GUCY2F | confirmed | [30, 31]     |
| RGS9   | GUCY2D | confirmed | [30, 31]     |
| RGS9   | RGS9BP | confirmed | [32]         |
| GNB5   | RGS9   | confirmed | [33]         |
| GNB5   | GNAT1  | inferred  | [34]         |
| RGS9   | PDE6G  | confirmed | [34, 35]     |
| RGS9   | GNAT1  | confirmed | [34]         |
| GNAT2  | RGS9   | inferred  | [34]         |
| GNB5   | GNAT2  | inferred  | [34]         |
| PDE6H  | RGS9   | inferred  | [34, 35]     |
| ROM1   | ROM1   | confirmed | [20]         |
| GNAT2  | GNB3   | inferred  | [14, 15, 19] |
| GNAT2  | GNGT2  | inferred  | [14, 16, 19] |
| GNB3   | GNGT2  | inferred  | [15, 16, 19] |
| GNAT1  | GNB1   | confirmed | [19]         |
| GNAT1  | GNGT1  | confirmed | [19]         |
| GNB1   | GNGT1  | confirmed | [19]         |

### Table S3 - Results

The results calculated for each gene are listed: the human protein length in amino acids, the non-synonymous substitution rate ( $d_N$ ), the synonymous substitution rate ( $d_S$ ), and the ratio  $d_N/d_S$  ( $\omega$ ).

| gene    | length | $d_N$ | $d_S$ | $\omega$ |
|---------|--------|-------|-------|----------|
| ABCA4   | 2273   | 0.13  | 0.94  | 0.139    |
| AIPL1   | 384    | 0.095 | 2.329 | 0.041    |
| ARR3    | 388    | 0.178 | 0.802 | 0.222    |
| ASCL1   | 236    | 0.012 | 1.534 | 0.008    |
| CNGA1   | 759    | 0.096 | 1.043 | 0.092    |
| CNGA3   | 698    | 0.156 | 1.452 | 0.107    |
| CNGB1   | 1251   | 0.173 | 1.423 | 0.121    |
| CNGB3   | 809    | 0.253 | 0.81  | 0.312    |
| CRX     | 299    | 0.052 | 1.322 | 0.039    |
| GNAT1   | 350    | 0.004 | 1.894 | 0.002    |
| GNAT2   | 354    | 0.041 | 0.882 | 0.047    |
| GNB1    | 340    | 0.003 | 1.047 | 0.003    |
| GNB3    | 340    | 0.042 | 1.094 | 0.039    |
| GNB5    | 395    | 0.011 | 1.011 | 0.01     |
| GNGT1   | 74     | 0.037 | 1.01  | 0.037    |
| GNGT2   | 69     | 0.119 | 1.056 | 0.113    |
| GPSM2   | 684    | 0.076 | 0.994 | 0.077    |
| GRK1    | 563    | 0.157 | 2.422 | 0.065    |
| GUCA1A  | 205    | 0.052 | 2.569 | 0.02     |
| GUCA1B  | 200    | 0.056 | 1.542 | 0.036    |
| GUCY2D  | 1103   | 0.158 | 1.533 | 0.103    |
| GUCY2F  | 1108   | 0.122 | 0.621 | 0.196    |
| LRAT    | 230    | 0.215 | 1.367 | 0.157    |
| NEUROD1 | 356    | 0.037 | 1.407 | 0.026    |
| NR2E3   | 410    | 0.079 | 1.386 | 0.057    |
| NR2F1   | 423    | 0.004 | 0.927 | 0.004    |
| NRL     | 237    | 0.191 | 1.165 | 0.164    |
| OPN1SW  | 348    | 0.157 | 0.972 | 0.162    |
| OTX2    | 297    | 0.023 | 0.377 | 0.06     |
| PDC     | 270    | 0.099 | 0.918 | 0.108    |
| PDE6A   | 860    | 0.055 | 1.187 | 0.046    |
| PDE6B   | 854    | 0.1   | 1.884 | 0.053    |
| PDE6C   | 858    | 0.142 | 1.051 | 0.135    |
| PDE6G   | 137    | 0.022 | 0.817 | 0.027    |
| PDE6H   | 83     | 0.091 | 0.953 | 0.096    |
| PIAS3   | 628    | 0.042 | 0.771 | 0.054    |
| PRPH2   | 346    | 0.08  | 1.579 | 0.051    |
| RBP1    | 197    | 0.023 | 1.141 | 0.021    |
| RBP3    | 1274   | 0.161 | 2.025 | 0.08     |

| gene    | length | $d_N$ | $d_S$ | $\omega$ |
|---------|--------|-------|-------|----------|
| RCVRN   | 200    | 0.121 | 1.293 | 0.094    |
| RDH12   | 316    | 0.125 | 1.104 | 0.113    |
| RDH5    | 318    | 0.129 | 0.883 | 0.146    |
| RDH8    | 311    | 0.149 | 1.183 | 0.126    |
| RGR     | 297    | 0.219 | 1.556 | 0.141    |
| RGS9    | 674    | 0.117 | 1.275 | 0.092    |
| RGS9BP  | 235    | 0.179 | 2.468 | 0.073    |
| RHO     | 348    | 0.052 | 1.905 | 0.027    |
| RLBP1   | 347    | 0.091 | 1.461 | 0.063    |
| ROM1    | 198    | 0.209 | 0.794 | 0.263    |
| RORA    | 556    | 0.012 | 0.697 | 0.017    |
| RORB    | 470    | 0.025 | 0.574 | 0.043    |
| RPE65   | 533    | 0.061 | 0.98  | 0.062    |
| RXRG    | 463    | 0.027 | 1.035 | 0.027    |
| SAG     | 405    | 0.137 | 1.09  | 0.126    |
| SLC24A1 | 1099   | 0.4   | 0.91  | 0.44     |
| SLC24A2 | 661    | 0.107 | 0.696 | 0.153    |
| THR3    | 476    | 0.041 | 0.668 | 0.062    |

### Table S4 - GenBank Accession Numbers for resequenced exons

Several exons were resequenced to account for their absence or poor sequence quality in the public genome databases. All exon sequences are available on GenBank

| gene    | species               | exon | Accession Number |
|---------|-----------------------|------|------------------|
| CNGB1   | <i>P. pygmaeus</i>    | 1    | KC484731         |
| CNGB1   | <i>P. pygmaeus</i>    | 24   | KC484732         |
| CNGB1   | <i>P. troglodytes</i> | 5    | KC484733         |
| CNGB1   | <i>P. troglodytes</i> | 6    | KC484734         |
| CNGB1   | <i>P. troglodytes</i> | 24   | KC484735         |
| CNGB1   | <i>G. gorilla</i>     | 28   | KC484736         |
| GRK1    | <i>P. troglodytes</i> | 3    | KC484737         |
| PDE6B   | <i>P. troglodytes</i> | 2    | KC484738         |
| PDE6B   | <i>P. troglodytes</i> | 4    | KC484739         |
| PDE6B   | <i>P. troglodytes</i> | 9    | KC484740         |
| PDE6B   | <i>P. troglodytes</i> | 10   | KC484741         |
| PDE6B   | <i>P. troglodytes</i> | 13   | KC484742         |
| PDE6B   | <i>P. troglodytes</i> | 14   | KC484743         |
| PDE6B   | <i>P. troglodytes</i> | 21   | KC484744         |
| PDE6B   | <i>P. pygmaeus</i>    | 5    | KC484745         |
| PDE6B   | <i>P. pygmaeus</i>    | 10   | KC484746         |
| RGS9    | <i>R. norvegicus</i>  | 1    | KC484747         |
| RGS9    | <i>R. norvegicus</i>  | 6    | KC484748         |
| SLC24A1 | <i>P. pygmaeus</i>    | 7    | KC484749         |
| SLC24A1 | <i>G. gorilla</i>     | 7    | KC484750         |



## References

1. Hanson SM, Van Eps N, Francis DJ, Altenbach C, Vishnivetskiy SA, Arshavsky VY, Klug CS, Hubbell WL, Gurevich VV: **Structure and function of the visual arrestin oligomer.** *The EMBO Journal* 2007, **26**(6):1726–1736, [<http://www.ncbi.nlm.nih.gov/pubmed/17332750>].
2. Chen CK, Inglese J, Lefkowitz RJ, Hurley JB: **Ca(2+)-dependent interaction of recoverin with rhodopsin kinase.** *The Journal of Biological Chemistry* 1995, **270**(30):18060–18066.
3. Kang K, Bauer PJ, Kinjo TG, Szerencsei RT, Bönigk W, Winkfein RJ, Schnetkamp PPM: **Assembly of retinal rod or cone Na(+)/Ca(2+)-K(+) exchanger oligomers with cGMP-gated channel subunits as probed with heterologously expressed cDNAs.** *Biochemistry* 2003, **42**(15):4593–4600, [<http://www.ncbi.nlm.nih.gov/pubmed/12693957>].
4. Poetsch A, Molday LL, Molday RS: **The cGMP-gated channel and related glutamic acid-rich proteins interact with peripherin-2 at the rim region of rod photoreceptor disc membranes.** *Journal of Biological Chemistry* 2001, **276**(51):48009–48016.
5. Peng C, Rich ED, Varnum MD: **Subunit Configuration of Heteromeric Cone Cyclic Nucleotide-Gated Channels.** *Neuron* 2004, **42**(3):401–410.
6. Chen T, Illing M, Molday L, Hsu Y, Yau K, Molday R: **Subunit 2 (or beta) of retinal rod cGMP-gated cation channel is a component of the 240-kDa channel-associated protein and mediates Ca(2+)-calmodulin modulation.** *Proceedings of the National Academy of Sciences* 1994, **91**(24):11757–11761.
7. Zheng J, Trudeau MC, Zagotta WN: **Rod Cyclic Nucleotide-Gated Channels Have a Stoichiometry of Three CNGA1 Subunits and One CNGB1 Subunit.** *Neuron* 2002, **36**(5):891–896.
8. Körschen HG, Beyermann M, Müller F, Heck M, Vantler M, Koch KW, Kellner R, Wolfrum U, Bode C, Hofmann KP, Kaupp UB: **Interaction of glutamic-acid-rich proteins with the cGMP signalling pathway in rod photoreceptors.** *Nature* 1999, **400**(6746):761–766, [<http://www.ncbi.nlm.nih.gov/pubmed/10466724>].
9. Kerov VS, Natochin M, Artemyev NO: **Interaction of transducin- $\alpha$  with LGN, a G-protein modulator expressed in photoreceptor cells.** *Molecular and Cellular Neuroscience* 2005, **28**:485–495.
10. Guo L, Hajipour A, Ruoho A: **Complementary interactions of the rod PDE6 inhibitory subunit with the catalytic subunits and transducin.** *Journal of Biological Chemistry* 2010, **285**(20):15209–15219.
11. Antonny B, Otto-Bruc A, Chabre M, Vuong T: **GTP hydrolysis by purified alpha-subunit of transducin and its complex with the cyclic GMP phosphodiesterase inhibitor.** *Biochemistry* 1993, **32**(33):8646–8653.
12. Zhu X, Brown B, Li A, Mears A, Swaroop A, Craft C: **GRK1-dependent phosphorylation of S and M opsins and their binding to cone arrestin during cone phototransduction in the mouse retina.** *Journal of Neuroscience* 2003, **23**(14):6152–6160.
13. Lerea C, Bunt-Milam A, Hurley J: **Alpha transducin is present in blue-, green-, and red-sensitive cone photoreceptors in the human retina.** *Neuron* 1989, **3**(3):367–376.
14. Lerea C, Somers D, Hurley J, Klock I, Bunt-Milam A: **Identification of specific transducin alpha subunits in retinal rod and cone photoreceptors.** *Science* 1986, **234**(4772):77–80.
15. Lee R, Lieberman B, Yamane H, Bok D, Fung B: **A third form of the G protein beta subunit. 1. Immunohistochemical identification and localization to cone photoreceptors.** *Journal of Biological Chemistry* 1992, **267**(34):24776–24781.
16. Ong O, Yamane H, Phan K, Fong H, Bok D, Lee R, Fung B: **Molecular cloning and characterization of the G protein gamma subunit of cone photoreceptors.** *Journal of Biological Chemistry* 1995, **270**(15):8495–8500.
17. Pfister C, Chabre M, Plouet J, Tuyen V, De Kozak Y, Faure J, Kühn H: **Retinal S antigen identified as the 48K protein regulating light-dependent phosphodiesterase in rods.** *Science* 1985, **228**(4701):891–893.
18. Palczewski K, McDowell J, Hargrave P: **Rhodopsin kinase: substrate specificity and factors that influence activity.** *Biochemistry* 1988, **27**:2306–2313.
19. Fung B, Hurley J, Stryer L: **Flow of information in the light-triggered cyclic nucleotide cascade of vision.** *Proceedings of the National Academy of Sciences* 1981, **78**:152–156.

20. Moritz OL, Molday RS: **Molecular cloning, membrane topology, and localization of bovine rom-1 in rod and cone photoreceptor cells.** *Investigative Ophthalmology & Visual Science* 1996, **37**(2):352–362, [<http://www.ncbi.nlm.nih.gov/pubmed/8603840>].
21. Chen F, Ng PS, Faull KF, Lee RH: **Cone photoreceptor  $\beta\gamma$ -transducin: posttranslational modification and interaction with phosducin.** *Investigative Ophthalmology & Visual Science* 2003, **44**(11):4622–4629, [<http://www.iovs.org/cgi/doi/10.1167/iovs.03-0420>].
22. Kuo C, Taniura H, Watanabe Y, Fukada Y, Yoshizawa T, Miki N: **Identification of a retina-specific MEKA protein as a 33 K protein.** *Biochemical and Biophysical Research Communications* 1989, **162**(3):1063–1068.
23. Gillespie P, Beavo J: **Characterization of a bovine cone photoreceptor phosphodiesterase purified by cyclic GMP-sepharose chromatography.** *The Journal of Biological Chemistry* 1988, **263**(17):8133–8141.
24. Hurwitz R, Bunt-Milam A, Chang M, Beavo J: **cGMP phosphodiesterase in rod and cone outer segments of the retina.** *The Journal of Biological Chemistry* 1985, **260**:568–573.
25. Deterre P, Bigay J, Forquet F, Robert M, Chabre M: **cGMP phosphodiesterase of retinal rods is regulated by two inhibitory subunits.** *Proceedings of the National Academy of Sciences* 1988, **85**(8):2424–2428.
26. Hurley J, Stryer L: **Purification and characterization of the gamma regulatory subunit of the cyclic GMP phosphodiesterase from retinal rod outer segments.** *The Journal of Biological Chemistry* 1982, **257**(18):11094–11099.
27. Yu H, Olshevskaya E, Duda T, Seno K, Hayashi F, Sharma R, Dizhoor A, Yamazaki A: **Activation of retinal guanylyl cyclase-1 by Ca<sup>2+</sup>-binding proteins involves its dimerization.** *The Journal of Biological Chemistry* 1999, **274**:15547–15555.
28. Rosenzweig DH, Nair KS, Levay K, Peshenko IV, Crabb JW, Dizhoor AM, Slepak VZ: **Interaction of retinal guanylate cyclase with the  $\alpha$  subunit of transducin: potential role in transducin localization.** *Biochemical Journal* 2009, **417**:803–812.
29. Koch KW, Duda T, Sharma RK: **Photoreceptor specific guanylate cyclases in vertebrate phototransduction.** *Molecular and Cellular Biochemistry* 2002, **230**:97–106.
30. Yu H, Bondarenko VA, Yamazaki A: **Inhibition of retinal guanylyl cyclase by the RGS9-1 N-terminus.** *Biochemical and Biophysical Research Communications* 2001, **286**:12–19, [<http://www.ncbi.nlm.nih.gov/pubmed/11485301>].
31. Seno K, Kishigami A, Ihara S, Maeda T, Bondarenko V, Nishizawa Y, Usukura J, Yamazaki A, Hayashi F: **A possible role of RGS9 in phototransduction. A bridge between the cGMP-phosphodiesterase system and the guanylyl cyclase system.** *The Journal of Biological Chemistry* 1998, **273**(35):22169–22172.
32. Hu G, Wensel T: **R9AP, a membrane anchor for the photoreceptor GTPase accelerating protein, RGS9-1.** *Proceedings of the National Academy of Sciences* 2002, **99**(15):9755–9760.
33. Makino E, Handy J, Li T, Arshavsky V: **The GTPase activating factor for transducin in rod photoreceptors is the complex between RGS9 and type 5 G protein beta subunit.** *Proceedings of the National Academy of Sciences* 1999, **96**(5):1947–1952.
34. He W, Cowan C, Wensel T: **RGS9, a GTPase accelerator for phototransduction.** *Neuron* 1998, **20**:95–102.
35. Slep KC, Kercher MA, He W, Cowan CW, Wensel TG, Sigler PB: **Structural determinants for regulation of phosphodiesterase by a G protein at 2.0Å.** *Nature* 2001, **409**(6823):1071–1077.
